# Supplementary material for: Self-doped p–n junctions in two-dimensional In2X3 van der Waals materials
Source: Royal Society of Chemistry journal article supplement (doi:10.1039/c9mh01109a), 2019-10-01
Supplement: c9mh01109a1.pdf [file c9mh01109a1.pdf]

## Supplementary Information

# Self-Doped p-n Junctions in Two-Dimensional $\text{In}_2\text{X}_3$ van der Waals Materials

Rui Peng<sup>†</sup>, Yandong Ma<sup>†,\*</sup>, Shuai Zhang<sup>†</sup>, Baibiao Huang<sup>†</sup>, Liangzhi Kou<sup>‡</sup> and Ying Dai<sup>†,\*</sup>

<sup>†</sup> School of Physics, State Key Laboratory of Crystal Materials, Shandong University, Shandan Street 27, Jinan 250100, China

<sup>‡</sup> School of Chemistry, Physics and Mechanical Engineering Faculty, Queensland University of Technology, Garden Point Campus, QLD 4001, Brisbane, Australia

\*Email: [yandong.ma@sdu.edu.cn](mailto:yandong.ma@sdu.edu.cn) (Y.M.); [daiy60@sina.com](mailto:daiy60@sina.com) (Y.D.)

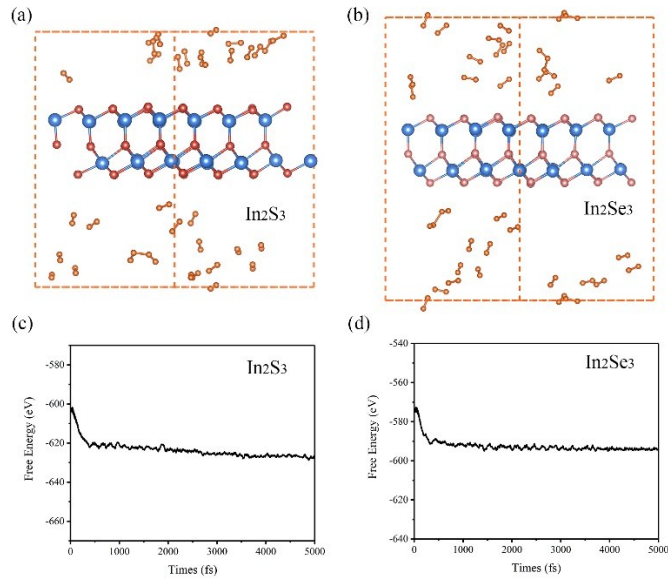

Fig. S1 Structure snapshots of (a) SL  $\text{In}_2\text{S}_3\text{-O}_2$  and (b) SL  $\text{In}_2\text{Se}_3\text{-O}_2$  for AIMD simulations at 300 K. Variations of the free energy of (c) SL  $\text{In}_2\text{S}_3\text{-O}_2$  and (d) SL  $\text{In}_2\text{Se}_3\text{-O}_2$  during AIMD simulations at 300 K.

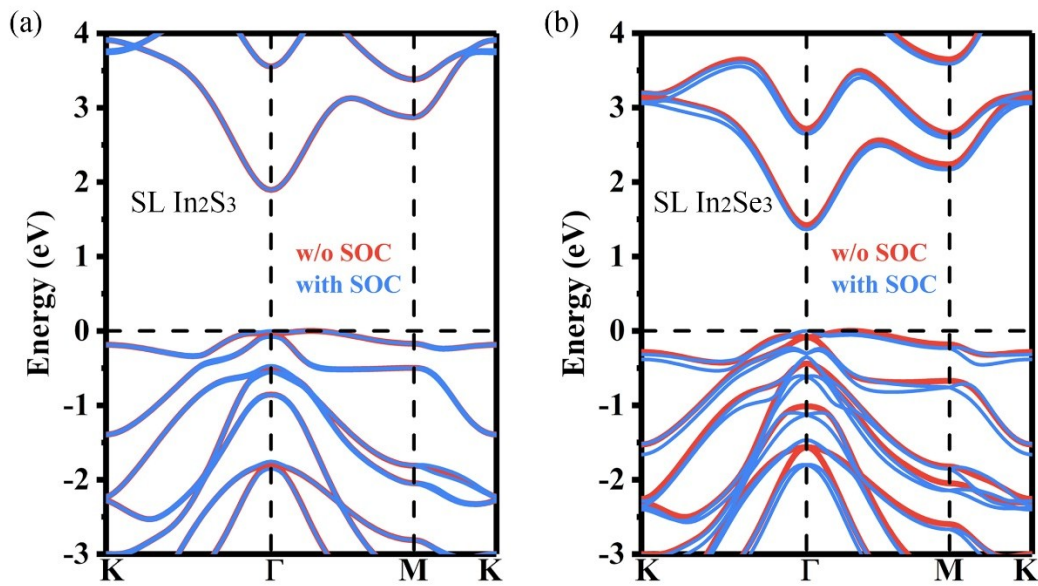

Fig. S2 Band structures of SL  $\text{In}_2\text{X}_3$  without and with SOC. The Fermi level is set to 0 eV.

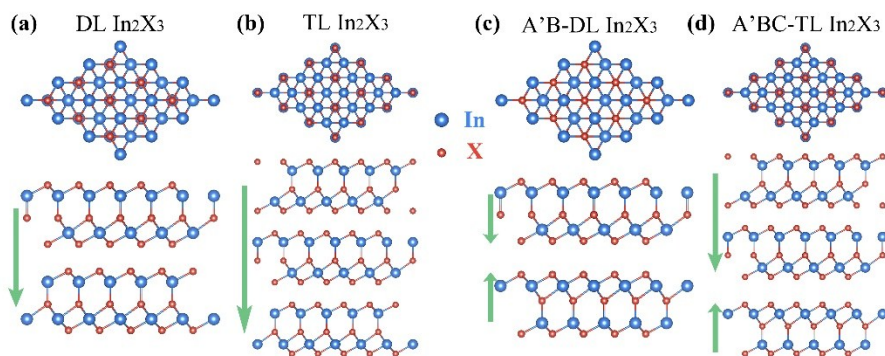

Fig. S3 Top and side views of the crystal structures of (a) DL  $\text{In}_2\text{X}_3$ , (b) TL  $\text{In}_2\text{X}_3$ , (c) A'B-DL  $\text{In}_2\text{X}_3$  and (d) A'BC-TL  $\text{In}_2\text{X}_3$ . The orientation of intrinsic dipole is represented by green arrows.

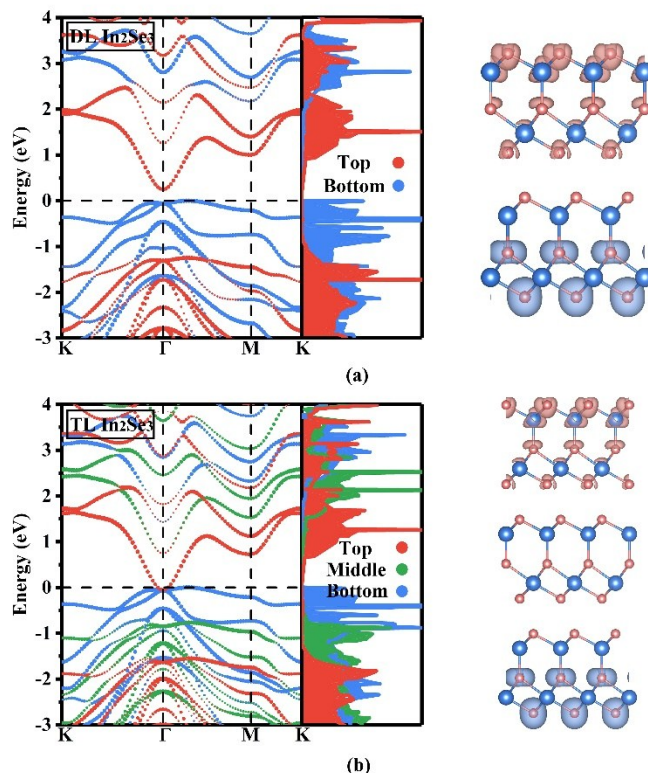

Fig. S4 Fat band structures, DOS, and partial charge density of CBM and VBM based on HSE06 level for (a) DL  $\text{In}_2\text{Se}_3$  and (b) TL  $\text{In}_2\text{Se}_3$ . The Fermi level is set to 0 eV. Red (blue) regions in the right panels represent the band decomposed charge density for CBM (VBM). The isosurface value is set to  $0.04 \text{ e } \text{\AA}^{-3}$ .

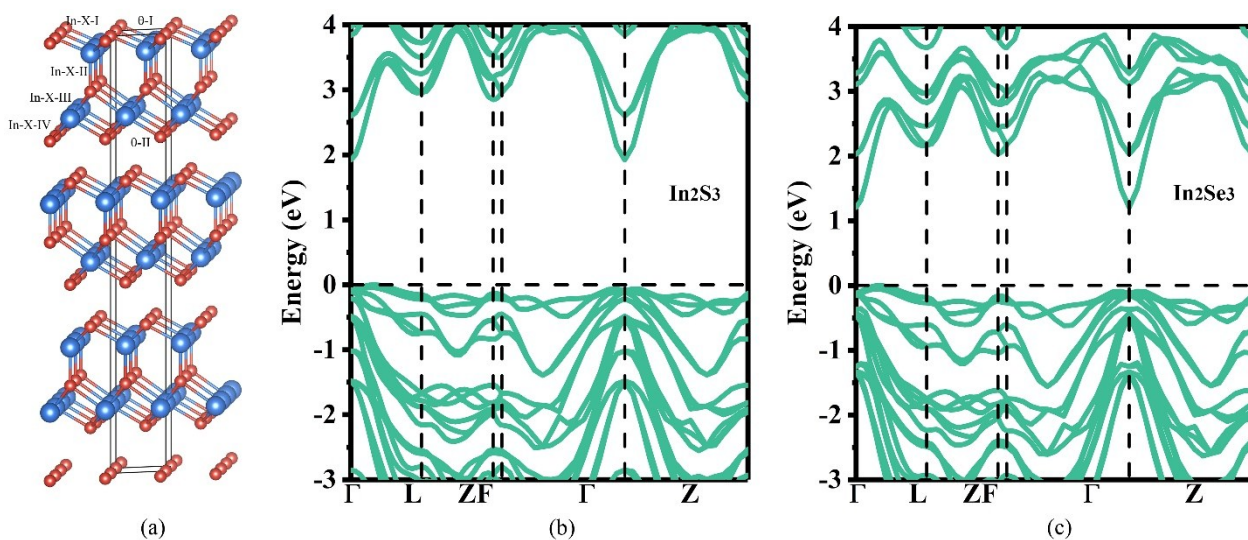

Fig. S5 (a) Crystal structure of bulk  $\text{In}_2\text{X}_3$ . Band structure of (b) bulk  $\text{In}_2\text{S}_3$  and (c) bulk  $\text{In}_2\text{Se}_3$ .

Table S1 The lattice constants  $a$  (Å) calculated by DFT-D2, optPBE-vdW and SCAN.

|                                    | DFT-D2 | optPBE-vdW | SCAN |
|------------------------------------|--------|------------|------|
| DL In <sub>2</sub> S <sub>3</sub>  | 3.85   | 3.93       | 3.89 |
| DL In <sub>2</sub> Se <sub>3</sub> | 4.00   | 4.09       | 4.06 |
| TL In <sub>2</sub> S <sub>3</sub>  | 3.85   | 3.93       | 3.89 |
| TL In <sub>2</sub> Se <sub>3</sub> | 4.00   | 4.09       | 4.06 |

Table S2 The bond length and angle of SL, DL, TL and bulk In<sub>2</sub>X<sub>3</sub>.

|                  | In <sub>2</sub> S <sub>3</sub> |       |       |       | In <sub>2</sub> Se <sub>3</sub> |       |       |        |
|------------------|--------------------------------|-------|-------|-------|---------------------------------|-------|-------|--------|
|                  | SL                             | DL    | TL    | Bulk  | SL                              | DL    | TL    | Bulk   |
| In-X-I (Å)       | 2.68                           | 2.65  | 2.65  | 2.64  | 2.55                            | 2.53  | 2.53  | 2.51   |
| In-X-II (Å)      | 2.56                           | 2.53  | 2.54  | 2.55  | 2.43                            | 2.41  | 2.42  | 2.43   |
| In-X-III (Å)     | 2.90                           | 2.86  | 2.85  | 2.84  | 2.79                            | 2.75  | 2.75  | 2.73   |
| In-X-IV (Å)      | 2.72                           | 2.69  | 2.69  | 2.70  | 2.58                            | 2.55  | 2.56  | 2.57   |
| $\theta$ -I (°)  | 99.90                          | 97.80 | 97.83 | 98.76 | 100.99                          | 99.01 | 99.17 | 100.39 |
| $\theta$ -II (°) | 98.18                          | 96.08 | 95.99 | 95.87 | 99.55                           | 97.59 | 97.44 | 97.34  |

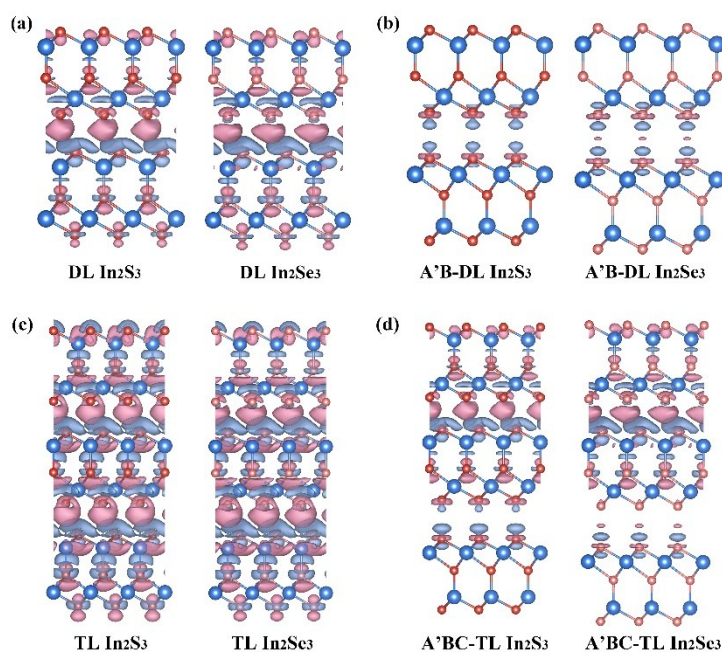

Fig. S6 Charge density differences of DL In<sub>2</sub>X<sub>3</sub> and individual In<sub>2</sub>X<sub>3</sub> layers for (a) DL In<sub>2</sub>X<sub>3</sub> and (b) A'B-DL In<sub>2</sub>X<sub>3</sub>. Charge density differences of TL In<sub>2</sub>X<sub>3</sub> and individual In<sub>2</sub>X<sub>3</sub> layers for (c) TL In<sub>2</sub>X<sub>3</sub>



and (d) A'BC-TL  $\text{In}_2\text{X}_3$ . The Red and blue regions indicate the accumulation and depletion of electrons, respectively. The isosurface value is set to  $0.001 \text{ e} \text{ \AA}^{-3}$ .

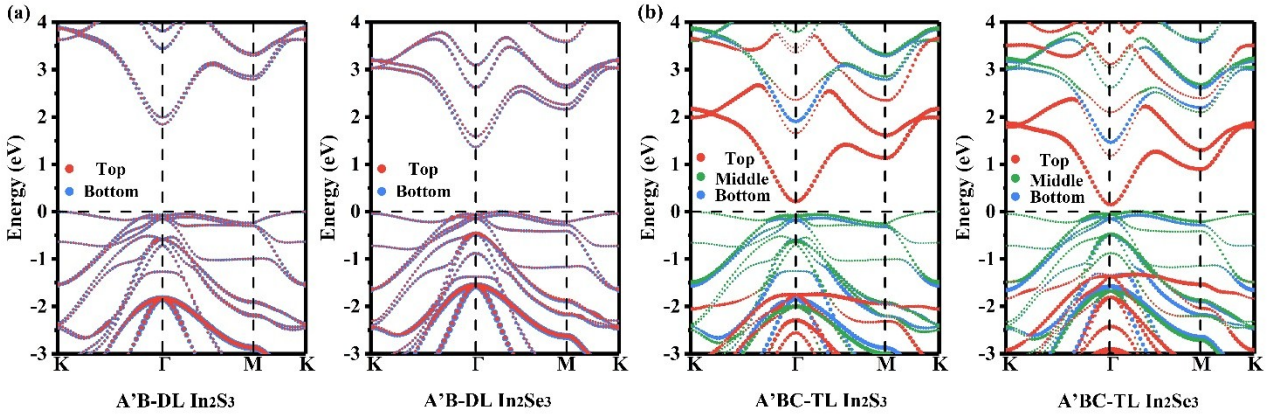

Fig. S7 Fat band structures based on HSE06 level of (a) A'B-DL  $\text{In}_2\text{X}_3$  and (b) A'BC-TL  $\text{In}_2\text{X}_3$ . The Fermi level is set to 0 eV.

Note 1

In order to simulate  $\text{In}_2\text{S}_3/\text{G}$  and  $\text{G}/\text{In}_2\text{S}_3$ , the  $3 \times 3$  supercell of graphene is used to match the  $2 \times 2$  supercell of  $\text{In}_2\text{S}_3$ . As for  $\text{In}_2\text{Se}_3/\text{G}$  and  $\text{G}/\text{In}_2\text{Se}_3$ , the  $\sqrt{3} \times \sqrt{3}$  supercell of graphene is used to match the  $1 \times 1$  supercell of  $\text{In}_2\text{Se}_3$ . The induced lattice mismatch is 3.8% and 3.9%, respectively. The binding energy between graphene and SL  $\text{In}_2\text{X}_3$  is calculated according to the below expression:

$$E_b = (E_{\text{het}} - E_{\text{In}_2\text{X}_3} - E_G)/N_C,$$

where  $E_{\text{het}}$ ,  $E_{\text{In}_2\text{X}_3}$ , and  $E_G$  are the total energies of the heterostructures ( $\text{In}_2\text{X}_3/\text{G}$  and  $\text{G}/\text{In}_2\text{X}_3$ ), SL  $\text{In}_2\text{X}_3$ , and graphene, respectively;  $N_C$  is the number of carbon atoms. The calculated binding energies for  $\text{In}_2\text{S}_3/\text{G}$  ( $\text{In}_2\text{Se}_3/\text{G}$ ) and  $\text{G}/\text{In}_2\text{S}_3$  ( $\text{G}/\text{In}_2\text{Se}_3$ ) are 0.26 (0.18) and 0.32 (0.17) eV, respectively, indicating that weak interlayer vdW interactions. The interlayer spacing for  $\text{G}/\text{In}_2\text{S}_3$  and  $\text{In}_2\text{S}_3/\text{G}$  are found to be 3.36 and 3.42 Å, respectively. We hypothetically change the interlayer spacing of  $\text{In}_2\text{S}_3/\text{G}$  from 3.42 to 3.36 Å and find that its band structure is slightly changed (see **Fig. S11**). The interlayer spacing for  $\text{G}/\text{In}_2\text{Se}_3$  and  $\text{In}_2\text{Se}_3/\text{G}$  are both 3.38 Å.

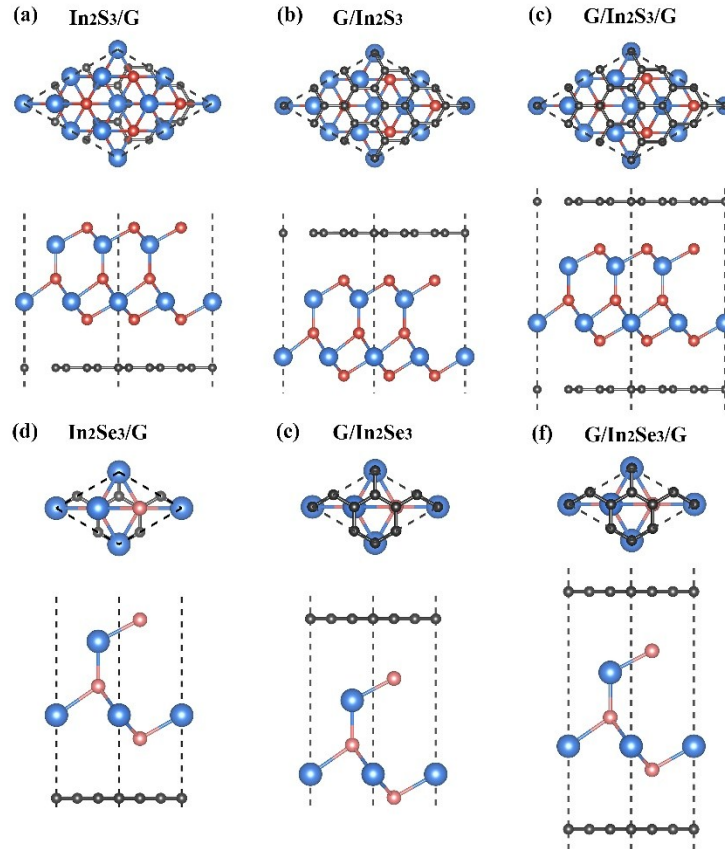

Fig. S8 Top and side views of the crystal structures of (a) In<sub>2</sub>S<sub>3</sub>/G, (b) G/In<sub>2</sub>S<sub>3</sub>, (c) G/In<sub>2</sub>S<sub>3</sub>/G, (d) In<sub>2</sub>Se<sub>3</sub>/G, (e) G/In<sub>2</sub>Se<sub>3</sub>, and (f) G/In<sub>2</sub>Se<sub>3</sub>/G.

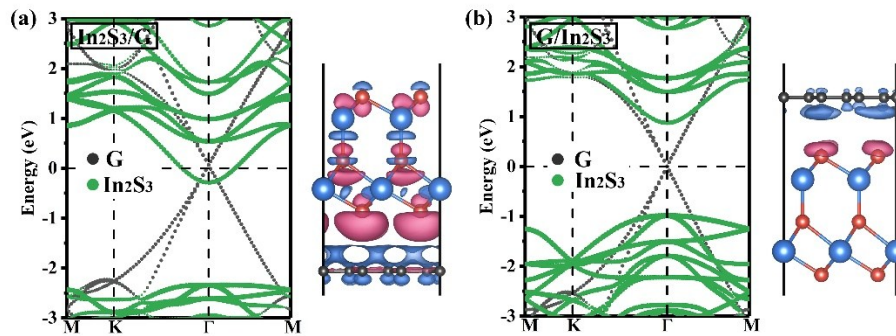

Fig. S9 Fat band structures based on HSE06 level and charge density differences of (a) In<sub>2</sub>S<sub>3</sub>/G and (b) G/In<sub>2</sub>S<sub>3</sub>. The Fermi level is set to 0 eV. The Red and blue regions in the right panels of (a, b) indicate the accumulation and depletion of electrons, respectively. The isosurface value is set to 0.001 e  $\text{\AA}^{-3}$ .

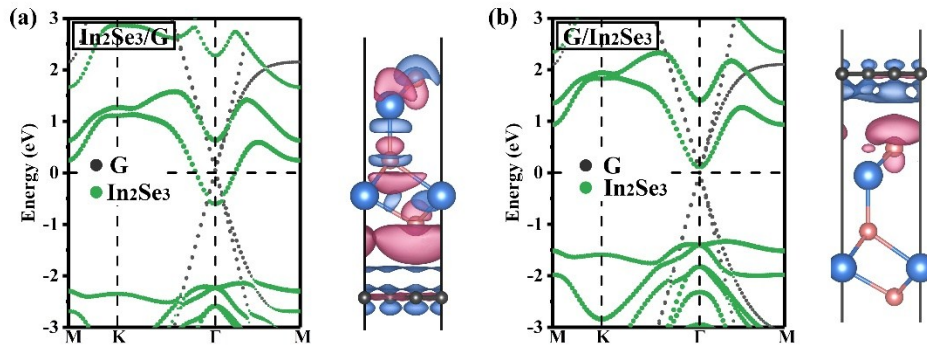

Fig. S10 Fat band structures based on HSE06 level and charge density differences of (a)  $\text{In}_2\text{Se}_3/\text{G}$  and (b)  $\text{G}/\text{In}_2\text{Se}_3$ . The Fermi level is set to 0 eV. The Red and blue regions in the right panels of (a, b) indicate the accumulation and depletion of electrons, respectively. The isosurface value is set to  $0.001 \text{ e \AA}^{-3}$ .

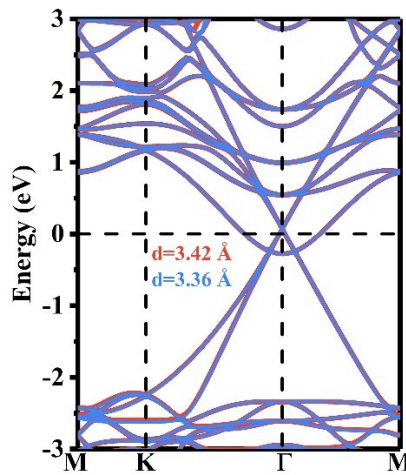

Fig. S11 Band structure of  $\text{In}_2\text{Se}_3/\text{G}$  with an interlayer distance of 3.42 Å and 3.36 Å.

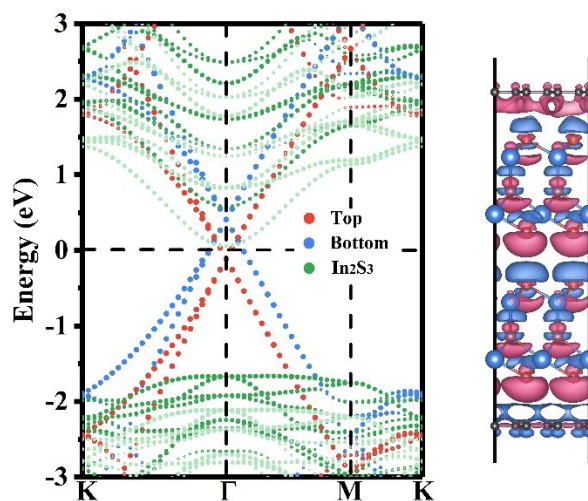

Fig. S12 Fat band structure based on HSE06 level and charge density difference of  $\text{G}/\text{DL In}_2\text{S}_3/\text{G}$ . The Fermi level is set to 0 eV. The Red and blue regions in the right panel indicate the accumulation and depletion of electrons, respectively. The isosurface value is set to  $0.001 \text{ e \AA}^{-3}$ .

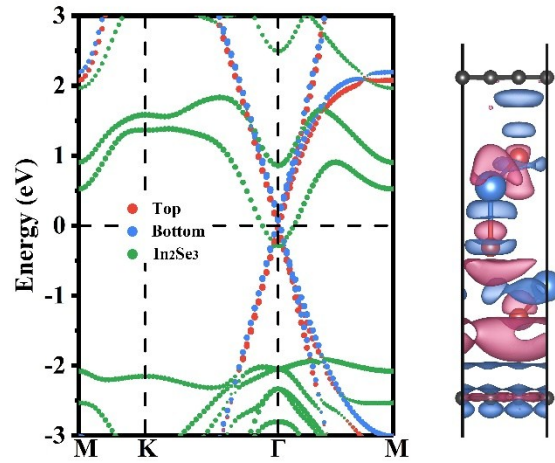

Fig. S13 Fat band structure based on HSE06 level and charge density difference of G/In<sub>2</sub>Se<sub>3</sub>/G. The Fermi level is set to 0 eV. The Red and blue regions in the right panel indicate the accumulation and depletion of electrons, respectively. The isosurface value is set to 0.001 e Å<sup>-3</sup>.

#### Note 2

The heterostructure of G/In<sub>2</sub>Se<sub>3</sub>/G is constructed. Regretfully, the Dirac points of two graphene layers are almost undisguisable. From the charge density difference, we can see that there are no electrons around the top-layer graphene, implying that the top-layer graphene is not p-doped. Additionally, the CBM of SL In<sub>2</sub>Se<sub>3</sub> cross the fermi level, which is not desirable for practical application.
